# Supplementary material for: Simultaneous detection of multiple proteases using a non-array nanopore platform
Source: Royal Society of Chemistry journal article supplement (doi:10.1039/d1nr04085e), 2021-01-01
Supplement: d1nr04085e1.pdf [file d1nr04085e1.pdf]

## Supporting Information

# Simultaneous detection of multiple proteases using a non-array nanopore platform

Xiaohan Chen, Youwen Zhang, and Xiyun Guan\*

Department of Chemistry, Illinois Institute of Technology, 3101 S Dearborn St, Chicago, IL 60616, USA

### Table of Contents:

|                                                                                                                                                                                                            |    |
|------------------------------------------------------------------------------------------------------------------------------------------------------------------------------------------------------------|----|
| <b>Figure S1.</b> Amplitude histograms of peptides (a) ARL and (b) RLAQAVRSSSARLVFFKPLGL .....                                                                                                             | S2 |
| <b>Figure S2.</b> 2D plots of event residence time and residual current, showing the difference among the substrate, substrate digestion product by ADAM17, and substrate cleavage product by ADAM10 ..... | S3 |
| <b>Figure S3.</b> Amplitude histogram of peptide RSSSARLVFFKPLGL.....                                                                                                                                      | S4 |
| <b>Figure S4.</b> Effect of the peptide length on the mean residual current of peptide translocation events.....                                                                                           | S5 |
| <b>Figure S5.</b> Plot of event frequency as a function of ADAM17 concentration .....                                                                                                                      | S6 |
| <b>Figure S6.</b> 3D plots of event counts vs. blockage amplitude vs. residence time, showing the simultaneous detection of ADAM10 and ADAM17.....                                                         | S7 |

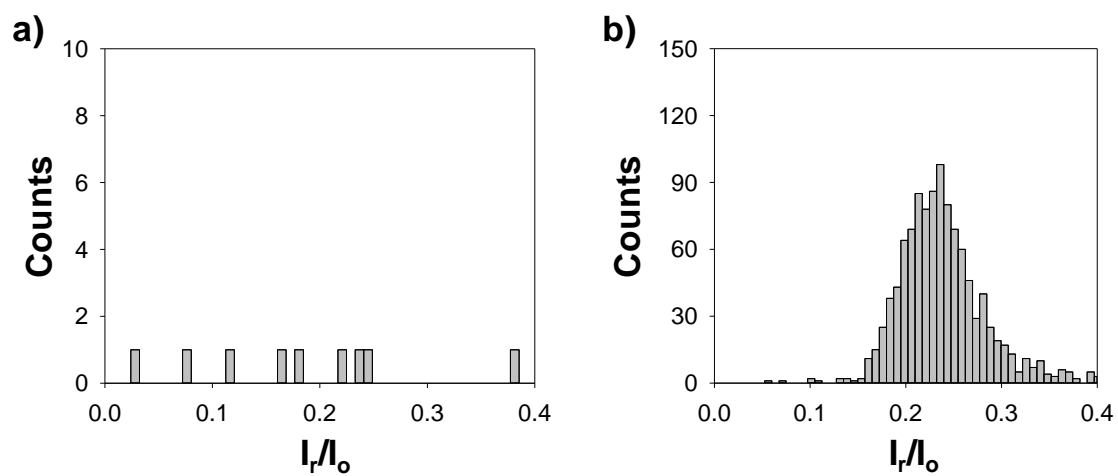

**Figure S1.** Amplitude histograms of peptides (a) ARL and (b) RLAQAVRSSSARLVFFKPLGL. The experiments were performed at + 120 mV in 3 M (*cis*) / 0.5 M (*trans*) NaCl with a wild type  $\alpha$ -hemolysin protein nanopore. Both the concentrations of peptides ARL and RLAQAVRSSSARLVFFKPLGL used were 2.5  $\mu$ M.

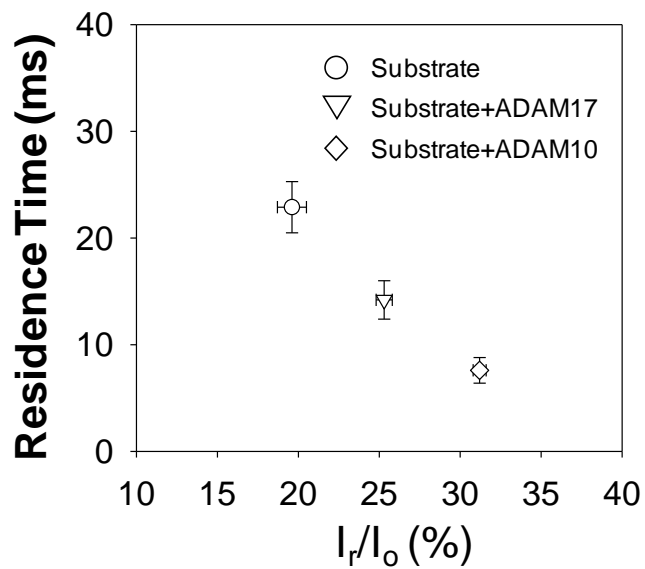

**Figure S2.** 2D plots of event residence time and residual current, showing the difference among the substrate, substrate digestion product by ADAM17, and substrate cleavage product by ADAM10. The experiment was performed at +120 mV in 3 M (*cis*) / 0.5 M (*trans*) NaCl with a wild type  $\alpha$ -hemolysin protein nanopore.

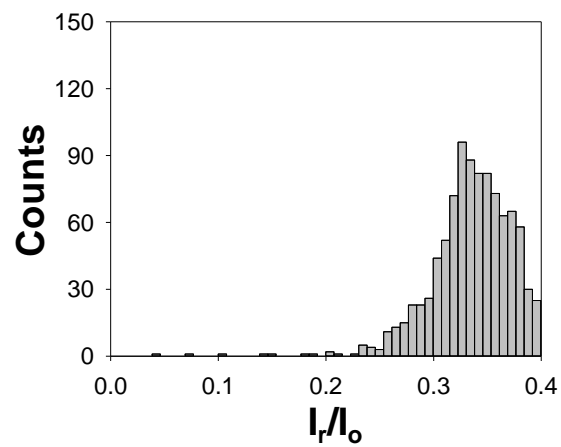

**Figure S3.** Amplitude histogram of peptide RSSSARLVFFKPLGL. The experiment was performed at +120 mV in 3 M (*cis*) / 0.5 M (*trans*) NaCl with a wild type  $\alpha$ -hemolysin protein nanopore. The concentration of peptide RSSSARLVFFKPLGL used was 2.5  $\mu$ M.

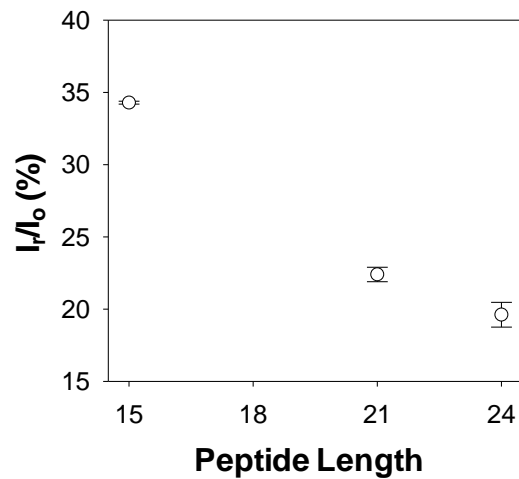

**Figure S4.** Effect of the peptide length on the mean residual current of peptide translocation events. The experiments were performed at +120 mV in 3 M (*cis*) /0.5 M (*trans*) NaCl with the wild type  $\alpha$ -hemolysin protein nanopore. The concentrations of the peptides used were 2.5  $\mu$ M each.

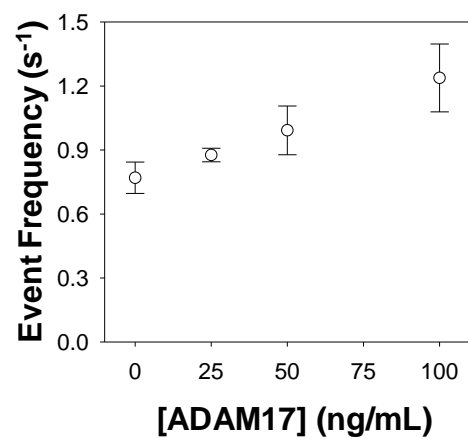

**Figure S5.** Plot of event frequency as a function of ADAM17 concentration. The experiments were performed at +120 mV in a salt gradient of 3 M (*cis*) / 0.5 M (*trans*) NaCl and in the presence of 2.5  $\mu$ M peptide substrate and 175 ng/mL of ADAM10.

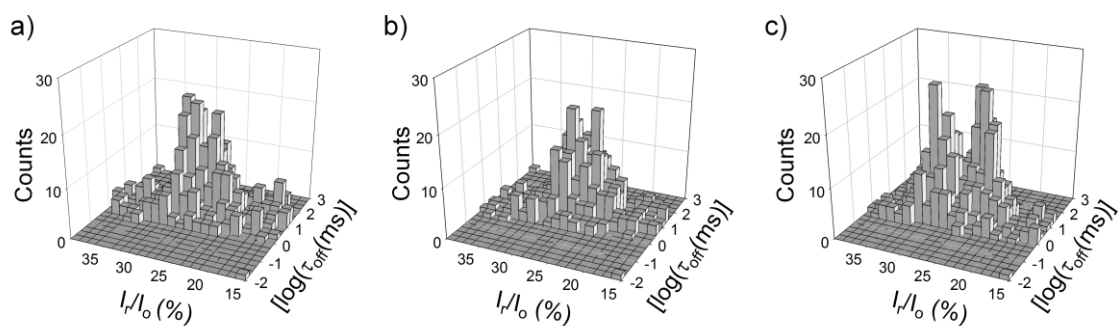

**Figure S6.** 3D plots of event counts vs. blockage amplitude vs. residence time, showing the simultaneous detection of ADAM10 and ADAM17. a) substrate (2.5  $\mu\text{M}$ ) + ADAM10 (175 ng/mL) + ADAM17 (25 ng/mL); b) substrate (2.5  $\mu\text{M}$ ) + ADAM10 (175 ng/mL) + ADAM17 (50 ng/mL); and c) substrate (2.5  $\mu\text{M}$ ) + ADAM10 (175 ng/mL) + ADAM17 (100 ng/mL). The experiments were performed at +120 mV in a salt gradient of 3 M (*cis*) / 0.5 M (*trans*) NaCl.
